# Supplementary material for: Quorum sensing triggers the stochastic escape of individual cells from Pseudomonas putida biofilms
Source: PubMed Central journal article supplement (PMC4309448; doi:10.1038/ncomms6945), 2015-01-16
Supplement: ncomms6945-s1.pdf [file ncomms6945-s1.pdf]

## Supplementary Information

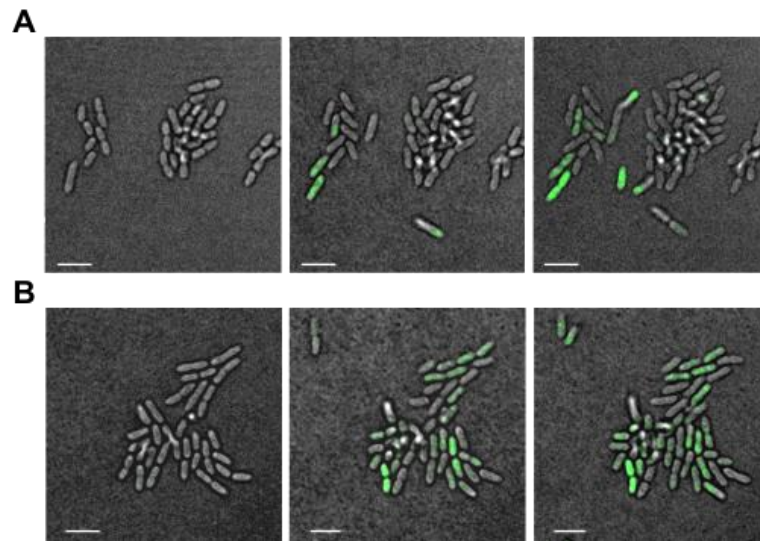

**Supplementary Fig. 1.** Exposure to saturating concentration of AHL does not affect stochastic AHL-induction at early stages of biofilm development of *P. putida* IsoF. Flow cells were initiated with IsoF carrying the GFP-based AHL sensor. (A) After microcolonies were formed, only a few cells start to produce AHLs. Furthermore, the appearance of induced-single-cells in the proximity of microcolonies suggests they left the colony once activated. (B) When the experiment was performed under uniform amount of autoinducer in the medium, 0.5  $\mu\text{M}$  3-oxo-C10-HSL, a similar pattern in terms of induction heterogeneity was observed, although induction occurred earlier and in a higher proportion of cells. Scale bar: 5  $\mu\text{m}$ .

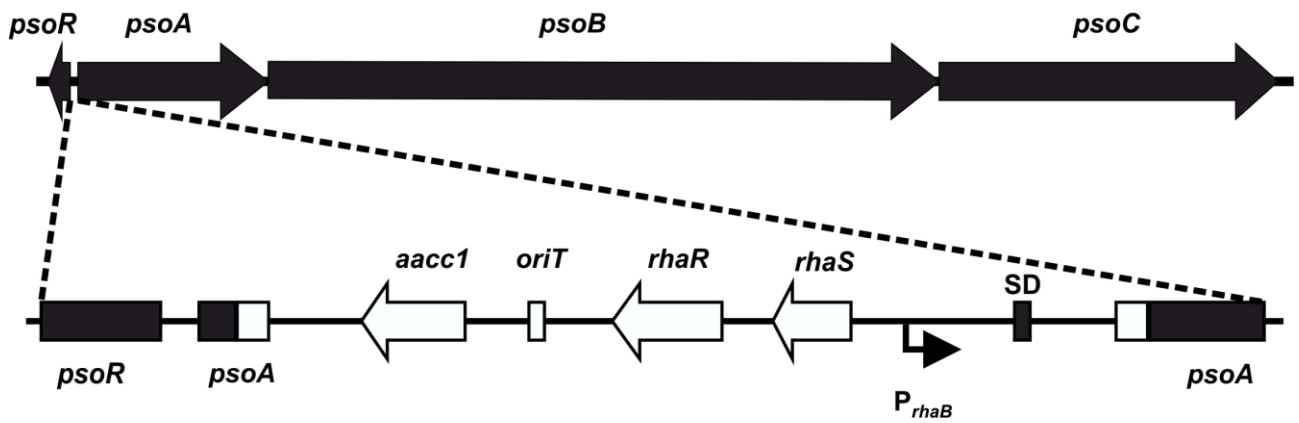

**Supplementary Fig. 2.** Structure of putisolvin biosynthetic cluster and schematic outline of the construction of the conditional *psoABC* mutant PL2, in which natural *psoA* promoter has been replaced by the rhamnose-inducible promoter  $P_{rhaB}$ . In addition, the strain carries genes required for the activation of the  $P_{rhaB}$  promoter (*rhaS* and *rhaR*); *aacC1*, aminoglycoside acetyltransferase (gentamycin resistance); *oriT*, origin of transfer; SD, Shine-Delgarno.

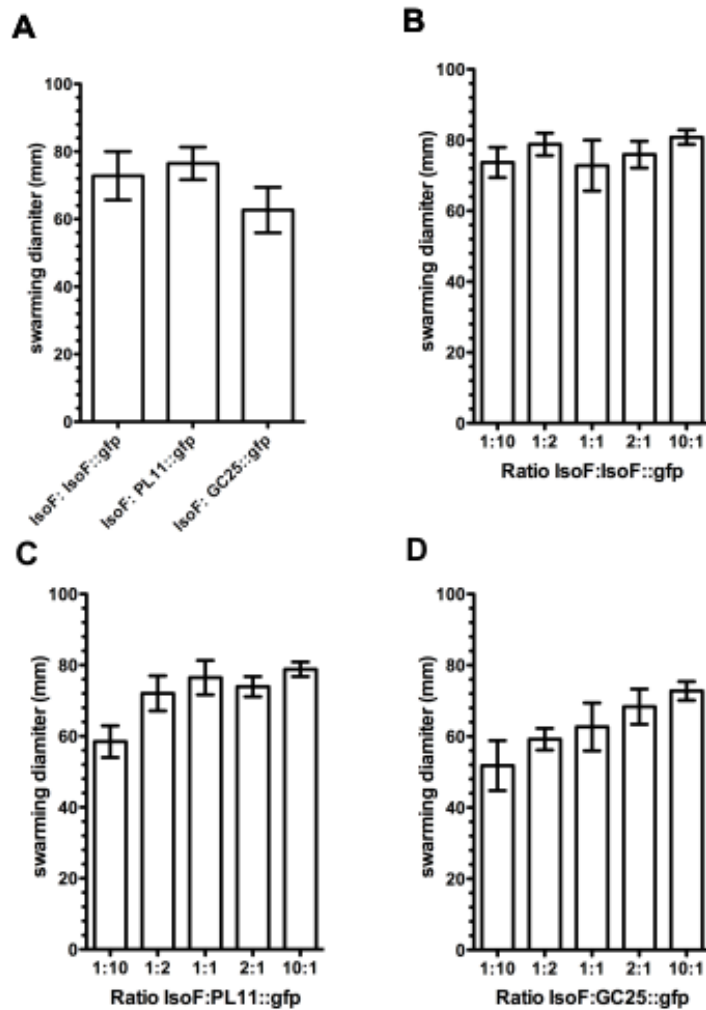

**Supplementary Fig. 3.** Swarming motility of mixed cultures. The wild type (IsoF) was combined with itself, the putisolvin-deficient PL11, or the flagella-deficient mutant GC25 strain on swarming plates. (A) In 1:1 mixes, the displacement of the swarming colony remains unaffected irrespective of the strain mixture. When mixing IsoF at different ratios with: (B) itself, IsoF::gfp; (C) with PL11::gfp; or (D) with GC25::gfp, the swarming performance was unaffected across most mixing ratios. Only when the proportion of IsoF was decreased to 10%, swarming displacement is slightly reduced in mixtures with PL11::gfp and GC25::gfp. These findings support our conclusions that PL11::gfp and GC25::gfp cannot swarm along with IsoF wild type. Mean values of three independent experiments are shown with s.e.m.

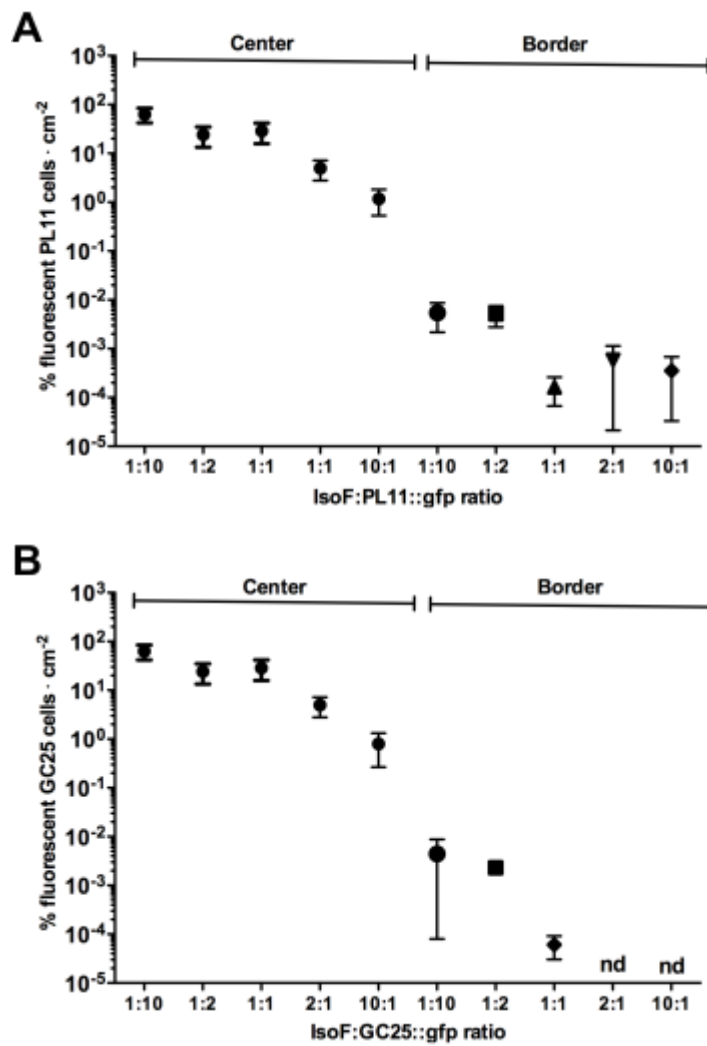

**Supplementary Fig. 4.** Putisolvins are not public goods in swarming colonies. In mixed colonies with IsoF, mutants deficient for (A) putisolvin (PL11:gfp) and (B) flagella (GC25:gfp) production remain located in the center of the plate, while IsoF swarms to the edges. This pattern remained consistent across a wide range of mixing ratios, confirming that putisolvin is a private good under swarming conditions. Mean values of three independent experiments are shown with s.e.m.

**Supplementary Table 1. Bacterial strains and plasmids used in this study**

| Strain or plasmid | Relevant properties                                                                                                                                                           | Source or reference |
|-------------------|-------------------------------------------------------------------------------------------------------------------------------------------------------------------------------|---------------------|
| <i>E. coli</i>    |                                                                                                                                                                               |                     |
| MT102             | <i>araD139 (ara-leu)7679 Δlac thi hsdR</i>                                                                                                                                    | This Laboratory     |
| CC118(λpir)       | <i>Δ(ara-leu) araD ΔlacX74 galE galK phoA20 thi-1 rpsE rpoB argE(Am) recA1 λpir</i> lysogen                                                                                   | 1                   |
| HB101             | <i>recA thi pro leu hsd M<sup>r</sup>; Sm<sup>R</sup></i>                                                                                                                     | 2                   |
| <i>P. putida</i>  |                                                                                                                                                                               |                     |
| IsoF              | wild type; isolated from tomato roots; AHL <sup>+</sup>                                                                                                                       | 3                   |
| F117              | <i>ppuI</i> mutant of IsoF; Km <sup>R</sup>                                                                                                                                   | 4                   |
| GC3               | <i>ppuR</i> mutant of IsoF; Km <sup>R</sup>                                                                                                                                   | This Laboratory     |
| PL11              | <i>psoA</i> mutant of IsoF; Gm <sup>R</sup>                                                                                                                                   | This study          |
| GC25              | <i>fliM</i> mutant of IsoF; Gm <sup>R</sup>                                                                                                                                   | This study          |
| PL2               | conditional <i>psoA</i> mutant of IsoF; P <sub><i>rhaB</i></sub> <sup>-</sup> <i>psoA</i> ; Gm <sup>R</sup>                                                                   | This study          |
| IsoF-mcherry      | IsoF tagged with mcherry, Gm <sup>R</sup>                                                                                                                                     | This laboratory     |
| <b>Plasmids</b>   |                                                                                                                                                                               |                     |
| pEX18             | gene replacement vector; Gm <sup>R</sup>                                                                                                                                      | 5                   |
| pEX18psoA         | pEX18 containing an internal fragment of <i>psoA</i> in the SmaI site; Gm <sup>R</sup>                                                                                        | This study          |
| pSHAFT2           | pUTmini-Tn5Cm with deleted BglII fragment; contains the <i>tnp</i> gene and I end of mini-Tn5; Gm <sup>R</sup>                                                                | This laboratory     |
| pSHAFT2fliM       | pSHAFT2 containing an internal fragment of <i>fliM</i> in the StuI site; Gm <sup>R</sup>                                                                                      | This study          |
| pSC200            | <i>oriR6K</i> ; rhamnose-inducible promoter P <sub><i>RhaB</i></sub> ; Tp <sup>R</sup>                                                                                        | 6                   |
| pSC200Gm          | Gm <sup>R</sup> resistance cassette cloned into XbaI/KpnI sites of pSC200; Gm <sup>R</sup>                                                                                    | This study          |
| pPO1              | pSC200Gm carrying internal <i>psoA</i> fragment; Gm <sup>R</sup>                                                                                                              | This study          |
| pPLlas            | pUT/mini with Km <sup>r</sup> :: <i>lasR</i> -P <sub><i>lac</i></sub> -P <sub><i>lasB</i></sub> <sup>-</sup> <i>gfp</i> (ASV)-T <sub>0</sub> -T <sub>1</sub> in the NotI site | 7                   |
| pRPL4las          | RP4 with Km <sup>R</sup> :: <i>lasR</i> -P <sub><i>lac</i></sub> -P <sub><i>lasB</i></sub> <sup>-</sup> <i>gfp</i> (ASV)                                                      | 7                   |
| pGA-G1            | Promoter probe vector carrying a promoterless <i>gfp</i> -mut3 gene; Gm <sup>R</sup>                                                                                          | 8                   |
| pLUM1             | P <sub><i>psoA</i></sub> promoter cloned into pGA-G1; Gm <sup>R</sup>                                                                                                         | This study          |
| pLUM3             | pBBR1MCS-3 carrying a P <sub><i>psoA</i></sub> :: <i>cfp</i> fusion; Tc <sup>R</sup>                                                                                          | This study          |
| pBAH8             | P <sub>A1/04/03</sub> - <i>gfp</i> mut3 fusion in pBBR1MCS-2; Km <sup>R</sup>                                                                                                 | 9                   |
| pBBR1MCS-3        | Broad-host-range plasmid, <i>lacZα</i> ; Tc <sup>R</sup>                                                                                                                      | 10                  |
| pBBR1MCS-5        | Broad-host-range plasmid, <i>lacZα</i> ; Gm <sup>R</sup>                                                                                                                      | 10                  |
| pRK600            | ColE1 RK2-Mob <sup>+</sup> RK2-Tra <sup>+</sup> ; helper plasmid; Cm <sup>R</sup>                                                                                             | 11                  |

## References

- 1 Herrero, M., de Lorenzo, V. & Timmis, K. N. Transposon vectors containing non-antibiotic resistance selection markers for cloning and stable chromosomal insertion of foreign genes in gram-negative bacteria. *J Bacteriol* **172**, 6557-6567 (1990).
- 2 Boyer, H. W. & Roulland-Dussoix, D. A complementation analysis of the restriction and modification of DNA in *Escherichia coli*. *J Mol Biol* **41**, 459-472 (1969).
- 3 Steidle, A. *et al.* Visualization of N-Acylhomoserine Lactone-Mediated Cell-Cell Communication between Bacteria Colonizing the Tomato Rhizosphere. *Applied and Environmental Microbiology* **67**, 5761-5770, doi:10.1128/AEM.67.12.5761-5770.2001 (2001).
- 4 Steidle, A. *et al.* Identification and characterization of an N-acylhomoserine lactone-dependent quorum-sensing system in *Pseudomonas putida* strain IsoF. *Applied and Environmental Microbiology* **68**, 6371-6382 (2002).
- 5 Hoang, T. T., Karkhoff-Schweizer, R. R., Kutchma, A. J. & Schweizer, H. P. A broad-host-range Flp-FRT recombination system for site-specific excision of chromosomally-located DNA sequences: application for isolation of unmarked *Pseudomonas aeruginosa* mutants. *Gene* **212**, 77-86 (1998).
- 6 Ortega, X. P. *et al.* A putative gene cluster for aminoarabinose biosynthesis is essential for *Burkholderia cenocepacia* viability. *J Bacteriol* **189**, 3639-3644, doi:10.1128/JB.00153-07 (2007).
- 7 Lumjiaktase, P., Aguilar, C., Battin, T., Riedel, K. & Eberl, L. Construction of self-transmissible green fluorescent protein-based biosensor plasmids and their use for identification of N-acyl homoserine-producing bacteria in lake sediments. *Appl Environ Microbiol* **76**, 6119-6127, doi:10.1128/AEM.00677-10 (2010).
- 8 Schwager, S., Lumjiaktase, P., Stöckli, M., Weisskopf, L. & Eberl, L. The genetic basis of cadmium resistance of *Burkholderia cenocepacia*. *Environmental Microbiology Reports* **4**, 562-568, doi:10.1111/j.1758-2229.2012.00372.x (2012).
- 9 Huber, B. *et al.* Genetic analysis of functions involved in the late stages of biofilm development in *Burkholderia cepacia* H111. *Mol Microbiol* **46**, 411-426 (2002).
- 10 Kovach, M. E. *et al.* Four new derivatives of the broad-host-range cloning vector pBBR1MCS, carrying different antibiotic-resistance cassettes. *Gene* **166**, 175-176 (1995).
- 11 de Lorenzo, V. & Timmis, K. N. Analysis and construction of stable phenotypes in gram-negative bacteria with Tn5- and Tn10-derived minitransposons. *Methods Enzymol* **235**, 386-405 (1994).
